# Supplementary material for: Magnetic behaviour of a spin-canted asymmetric lanthanide quinolate trimer
Source: Royal Society of Chemistry journal article supplement (doi:10.1039/d4dt01588f), 2024-01-01
Supplement: d4dt01588f1.pdf [file d4dt01588f1.pdf]

## Supporting Information

# **Magnetic Behaviour of a Spin-Canted Asymmetric Lanthanide Quinolate Trimer**

Lester Batista<sup>a</sup>, Sagar Paul<sup>b</sup>, Concepcion Molina-Jirón<sup>c,d\*</sup>, Juan A. Jaén<sup>e,f</sup>, Dieter Fensker<sup>g</sup>, Olaf Fuhr<sup>g,h</sup>, Mario Ruben<sup>d,g,i\*</sup>, Wolfgang Wernsdorfer<sup>b,d\*</sup> and Eufemio Moreno-Pineda<sup>b,e,f\*</sup>

<sup>a</sup> Universidad de Panamá, Facultad de Ciencias Naturales, Exactas y Tecnología, Depto. Física, 0824, Panamá.

<sup>b</sup> Physikalisches Institut, Karlsruhe Institute of Technology, D-76131, Karlsruhe, Germany.

<sup>c</sup> Universidad de Panamá, Facultad de Ciencias Naturales, Exactas y Tecnología, Depto. de Bioquímica, 0824, Panamá.

<sup>d</sup> Institute of Quantum Materials and Technologies (IQMT), Karlsruhe Institute of Technology (KIT), Hermann-von-Helmholtz-Platz 1, 76344, Eggenstein-Leopoldshafen, Germany.

<sup>e</sup> Universidad de Panamá, Facultad de Ciencias Naturales, Exactas y Tecnología, Depto. de Química-Física, 0824, Panamá.

<sup>f</sup> Universidad de Panamá, Facultad de Ciencias Naturales, Exactas y Tecnología, Grupo de Investigación de Materiales, Panamá, 0824, Panamá.

<sup>g</sup> Institute of Nanotechnology (INT), Karlsruhe Institute of Technology (KIT), Kaiserstraße 12, D-76131 Karlsruhe, Germany.

<sup>h</sup> Karlsruhe Nano Micro Facility (KNMF), Karlsruhe Institute of Technology (KIT), Kaiserstraße 12, D-76131 Karlsruhe, Germany.

<sup>i</sup> Centre Européen de Sciences Quantiques (CESQ), Institut de Science et d'Ingénierie Supramoléculaires (ISIS), 8 allée Gaspard Monge, BP 70028, 67083, Strasbourg Cedex, France.

\*Correspondence to: [eufemio.moreno@up.ac.pa](mailto:eufemio.moreno@up.ac.pa); [concepcion.molina@up.ac.pa](mailto:concepcion.molina@up.ac.pa); [mario.rube@kit.edu](mailto:mario.rube@kit.edu); [wolfgang.wernsdorfer@kit.edu](mailto:wolfgang.wernsdorfer@kit.edu)

## **1. EXPERIMENTAL SECTION**

### **1.1. Synthetic method**

All reactions were carried out under aerobic conditions. Solvents and reagents were used as purchased without additional purification.

**Synthesis of [Dy<sub>3</sub>(hq)<sub>7</sub>(NO<sub>3</sub>)<sub>2</sub>(H<sub>2</sub>O)]:** the reaction of Dy(NO<sub>3</sub>)<sub>3</sub>·nH<sub>2</sub>O (0.548 g, 1.2 mmol)\*, 8-hydroxyquinoline (0.464 g, 3.2 mmol) and Et<sub>3</sub>N (0.14 mL, 1 mmol) in refluxing acetonitrile (20 mL) for two hours lead to a deep orange solution. The solution was then allowed to cool down to room temperature and filtered. Orange crystals (of X-ray diffraction quality) of [Dy<sub>3</sub>(hq)<sub>7</sub>(NO<sub>3</sub>)<sub>2</sub>(H<sub>2</sub>O)] were obtained after two days of slow evaporation of the solvent in 45% yield (based on the metal content). Elemental analysis Calcd. for (C<sub>65</sub>H<sub>47</sub>Dy<sub>3</sub>O<sub>14</sub>N<sub>10</sub>): C, 46.77; H, 2.93; N, 8.95. Found: C = 46.89, H, 2.89, N = 8.83.

\*the molar quantity of the Dy(III) salt was calculated based on the hexahydrate Dy(III) salt (Dy(NO<sub>3</sub>)<sub>3</sub>·6H<sub>2</sub>O)

### **1.2. X-ray data collection and structure solution**

Single crystal X-ray diffraction measurements for [Dy<sub>3</sub>(hq)<sub>7</sub>(NO<sub>3</sub>)<sub>2</sub>(H<sub>2</sub>O)] were carried out on a Stoe StadiVari diffractometer with MoK<sub>α</sub> radiation (λ = 0.71073 Å). The crystals were mounted on a MiTeGen Microloop using crystallographic perfluorether oil and placed in a cryostream. Data were collected using ω scans to give a complete asymmetric unit. The structures were solved and

refined by full-matrix least-squares methods on all  $F^2$  using SHELX-2018 implemented in Olex2. All non-hydrogen atoms were refined anisotropically. Hydrogen atoms were calculated geometrically and were riding on their parent atoms. Full crystallographic details can be found in CIF format: in the Cambridge Crystallographic Data Centre database (CCDC-2354974). These data can be obtained free of charge via [www.ccdc.cam.ac.uk/conts/retrieving.html](http://www.ccdc.cam.ac.uk/conts/retrieving.html) (or from Cambridge Crystallographic Data Centre, 12 Union Road, Cambridge CB21EZ, UK; fax: (+44)1223-336-033; or [deposit@ccdc.cam.ac.uk](mailto:deposit@ccdc.cam.ac.uk)).

### 1.3. Magnetic measurements

Magnetic susceptibility measurements were conducted in a Quantum Design MPMS-XL SQUID magnetometer on polycrystalline materials in the temperature range of 2 - 300 K with an applied DC magnetic field ( $H_{DC}$ ) of 1 kOe. The DC data were corrected for diamagnetic contributions from the sample holder and eicosane. Core diamagnetic corrections were performed employing Pascal's constants. The AC data was collected in an oscillating magnetic field of 3.5 Oe and frequencies between 1 and 1.5 kHz. Low temperature (0.03 - 5 K) magnetization studies were performed on single crystals employing a  $\mu$ SQUID array at sweep rates between 0.128 and 0.001 T s<sup>-1</sup>. The time resolution was approximately 1 ms. The magnetic field was applied in different directions of the  $\mu$ SQUID plane with a precision better than 0.1° by driving three orthogonal coils separately. To ensure good thermalisation, each sample was fixed with apiezon grease.

### 1.4. Theoretical Calculations

For the Complete-active-space self-consistent field (CASSCF) calculations for **[Dy<sub>3</sub>(hq)<sub>7</sub>(NO<sub>3</sub>)<sub>2</sub>(H<sub>2</sub>O)]**, we employed OpenMolcas<sup>1,2</sup>. CASSCF-SO calculations were performed on the trinuclear Dy(III) system, using the crystallographic coordinates obtained from the SCXRD structures with no further optimisations. For the calculations two Dy(III) ions were substituted by Y(III) at the time. Basis sets from the ANO-RCC library<sup>3-5</sup> were employed with VTZP quality for Dy, VDZP quality for the coordinated N and O atoms, and VDZ quality for all distant atoms, using the second-order DKH transformation<sup>6</sup>. The molecular orbitals (MOs) were optimised in state-averaged CASSCF calculations. For this, the active space was defined by the nine 4f electrons in the seven 4f orbitals of Dy(III). Three calculations were performed independently for each possible spin state, where 21 roots were included for  $S = 5/2$ , 224 roots for  $S = 3/2$ , and 490 roots for  $S = 1/2$  (RASSCF routine). The wavefunctions obtained from these CASSCF calculations were posteriorly mixed by spin-orbit coupling, where all 21 of the  $S = 5/2$  states, 128 of the  $S = 3/2$  states, and 130 of the  $S = 1/2$  states were included (RASSI routine<sup>7</sup>). The resulting spin-orbit wavefunctions were decomposed into their CF wavefunctions in the <sup>6</sup>H<sub>15/2</sub> basis, employing the SINGLE\_ANISO routine<sup>8,9</sup>, and the magnetic susceptibility was calculated.

### 1.5. Dipolar Matrix

Dipolar interactions between two  $S_{eff} = 1/2$  states can be calculated employing the following equation:

$$H_{dip} = \frac{\mu_0 \mu_B^2}{4\pi r^3} - \left[ \bar{g}_{A(\alpha,\beta,\gamma)} \cdot \bar{g}_{B((\alpha,\beta,\gamma))} - 3(\bar{g}_{A(\alpha,\beta,\gamma)} \cdot \vec{R}) \cdot (\vec{R}^T \cdot \bar{g}_{B(\alpha,\beta,\gamma)}) \right]$$

where  $\mu_B$  is the Bohr magneton,  $\mu_0$  the vacuum permittivity,  $r$  is the Ln...Ln distance obtained from crystal structures.  $\bar{g}_{A/B}$  is the  $g$ -matrix of ion A and B, and  $\vec{R}$  is the directional unit vector

between the two ions, based on the CASSCF results. The angles of the rotation matrix are the Euler angles, obtained from the CASSCF results, using the Z-Y'-Z'' convention according to the following equations:

$$\bar{R}_{Z(\alpha)} = \begin{pmatrix} \cos \alpha & -\sin \alpha & 0 \\ \sin \alpha & \cos \alpha & 0 \\ 0 & 0 & 1 \end{pmatrix}$$

$$\bar{R}_{Y(\beta)} = \begin{pmatrix} \cos \beta & 0 & \sin \beta \\ 0 & 1 & 0 \\ -\sin \beta & 0 & \cos \beta \end{pmatrix}$$

$$\bar{R}_{Z''(\gamma)} = \begin{pmatrix} \cos \gamma & -\sin \gamma & 0 \\ \sin \gamma & \cos \gamma & 0 \\ 0 & 0 & 1 \end{pmatrix}$$

$$\bar{R}_{i(\alpha,\beta,\gamma)} = \bar{R}_{Z(\alpha)} \cdot \bar{R}_{Y(\beta)} \cdot \bar{R}_{Z''(\gamma)}$$

$$\bar{g}_{i(\alpha,\beta,\gamma)} = \bar{R}_{i(\alpha,\beta,\gamma)} \cdot \bar{g}_i \cdot \bar{R}_{i(\alpha,\beta,\gamma)}^T$$

For the calculation of the dipolar matrix, the reference frame was chosen as shown in Figure S5.

The g-values were used as obtained from CASSCF-SO calculations, which are based on the  $S_{eff} = \frac{1}{2}$  formalism:

$$\bar{g}_{Dy(1)} = \begin{pmatrix} 0 & 0 & 0 \\ 0 & 0 & 0 \\ 0 & 0 & 19.7 \end{pmatrix}; \bar{g}_{Dy(2)} = \begin{pmatrix} 1.2 & 0 & 0 \\ 0 & 2.5 & 0 \\ 0 & 0 & 15.9 \end{pmatrix}; \bar{g}_{Dy(3)} = \begin{pmatrix} 1.3 & 0 & 0 \\ 0 & 2.4 & 0 \\ 0 & 0 & 16.1 \end{pmatrix}$$

These three ions are connected by a unit vector of the form:

$$\bar{R}_{1-2} = \begin{pmatrix} 0.23 \\ 0.53 \\ 0.82 \end{pmatrix} \text{ and } \bar{R}_{2-3} = \begin{pmatrix} 0.58 \\ 0.67 \\ 0.46 \end{pmatrix}$$

Thus, this leads to a dipolar matrix for Dy(1) and Dy(2) Dy(III) ions separated by a distance of 3.5592(6) Å and with  $\alpha_{Dy(1)} = 21^\circ$ ,  $\beta_{Dy(1)} = 37^\circ$  and  $\gamma_{Dy(1)} = 164^\circ$  and  $\alpha_{Dy(2)} = -78^\circ$ ,  $\beta_{Dy(2)} = 87^\circ$  and  $\gamma_{Dy(2)} = -53^\circ$ , while for Dy(3) and Dy(2) Dy(III) the distance is 3.5120(6) Å and with  $\alpha_{Dy(3)} = 121^\circ$ ,  $\beta_{Dy(3)} = 55^\circ$  and  $\gamma_{Dy(3)} = 161^\circ$ . The obtained dipolar matrix for Dy<sub>1-2</sub> has the form (for an +J Hamiltonian):

$$J_{Dy1-2}^{dip} = \begin{pmatrix} 0.430 & -1.818 & -0.199 \\ 0.165 & -0.698 & -0.076 \\ 0.612 & -2.585 & -0.283 \end{pmatrix} \text{ cm}^{-1}$$

while for Dy<sub>2-3</sub> has the form (for an +J Hamiltonian)

$$J_{Dy2-3}^{dip} = \begin{pmatrix} 0.208 & -0.218 & -0.156 \\ -0.380 & -0.134 & -0.254 \\ -0.051 & -0.048 & -0.075 \end{pmatrix} \text{ cm}^{-1}$$

Which for a  $J = 15/2$  are:

$$J_{Dy1-2}^{dip} = \begin{pmatrix} 1.91 \times 10^{-2} & -8.08 \times 10^{-2} & -8.84 \times 10^{-3} \\ 7.34 \times 10^{-3} & -3.10 \times 10^{-2} & -3.39 \times 10^{-3} \\ 2.72 \times 10^{-2} & -1.15 \times 10^{-1} & -1.26 \times 10^{-2} \end{pmatrix} \text{cm}^{-1}$$

$$J_{Dy2-3}^{dip} = \begin{pmatrix} 9.27 \times 10^{-3} & -9.70 \times 10^{-3} & -6.94 \times 10^{-3} \\ -1.69 \times 10^{-2} & -5.96 \times 10^{-3} & -1.13 \times 10^{-2} \\ -2.28 \times 10^{-3} & 2.12 \times 10^{-3} & -3.34 \times 10^{-3} \end{pmatrix} \text{cm}^{-1}$$

Projecting the strongest component of the dipolar matrices (i.e.,  $-8.08 \times 10^{-2}$ ) onto a  $S = 5/2$  state is  $\sim 0.73 \text{ cm}^{-1}$ .

**Table S1.** Crystal Data and Structure Refinements for **[Dy<sub>3</sub>(hq)<sub>7</sub>(NO<sub>3</sub>)<sub>2</sub>(H<sub>2</sub>O)·2.5(CH<sub>3</sub>CN)**

|                                                                                                   |                                                                                     |
|---------------------------------------------------------------------------------------------------|-------------------------------------------------------------------------------------|
| Formula                                                                                           | C <sub>68</sub> H <sub>51.5</sub> Dy <sub>3</sub> N <sub>11.5</sub> O <sub>14</sub> |
| Fw                                                                                                | 1741.20                                                                             |
| T(K)                                                                                              | 180                                                                                 |
| crystal system                                                                                    | triclinic                                                                           |
| space group                                                                                       | <i>P</i> $\bar{1}$                                                                  |
| <i>a</i> , Å                                                                                      | 11.6383(4)                                                                          |
| <i>b</i> , Å                                                                                      | 16.6621(6)                                                                          |
| <i>c</i> , Å                                                                                      | 18.2109(6)                                                                          |
| $\alpha$ , deg                                                                                    | 76.207(3)                                                                           |
| $\beta$ , deg                                                                                     | 72.362(3)                                                                           |
| $\gamma$ , deg                                                                                    | 88.591(3)                                                                           |
| <i>V</i> (Å <sup>3</sup> )                                                                        | 3264.0(2)                                                                           |
| <i>Z</i>                                                                                          | 2                                                                                   |
| $\rho_{\text{Calcd.}}$ (mg·m <sup>-3</sup> )                                                      | 1.772                                                                               |
| $\mu$ (mm <sup>-1</sup> )                                                                         | 3.474                                                                               |
| <i>R</i> <sub>int</sub>                                                                           | 0.0400                                                                              |
| GOF on <i>F</i> <sup>2</sup>                                                                      | 0.797                                                                               |
| <i>R</i> <sub>1</sub> , <i>wR</i> <sub>2</sub> ( <i>I</i> > 2 $\sigma$ ( <i>I</i> )) <sup>a</sup> | <i>R</i> <sub>1</sub> = 0.0318, <i>wR</i> <sub>2</sub> = 0.0502                     |
| <i>R</i> <sub>1</sub> , <i>wR</i> <sub>2</sub> (all data)                                         | <i>R</i> <sub>1</sub> = 0.0575, <i>wR</i> <sub>2</sub> = 0.0523                     |
| CCDC number                                                                                       | 2354974                                                                             |

**Table S2.** Continuous shaped measures (CShM) for  $\{Ln_3\}$  obtained using SHAPE.

| <b>CShM</b>     | <b>Dy(1)</b> | <b>CShM</b>     | <b>Dy(2)</b> | <b>CShM</b>     | <b>Dy(3)</b> |
|-----------------|--------------|-----------------|--------------|-----------------|--------------|
| <b>OP-8</b>     | 30.513       | <b>OP-8</b>     | 27.576       | <b>EP-9</b>     | 35.964       |
| <b>HPY-8</b>    | 21.381       | <b>HPY-8</b>    | 21.471       | <b>OPY-9</b>    | 21.923       |
| <b>HBPY-8</b>   | 16.624       | <b>HBPY-8</b>   | 17.110       | <b>HBPY-9</b>   | 16.336       |
| <b>CU-8</b>     | 10.533       | <b>CU-8</b>     | 11.711       | <b>JTC-9</b>    | 15.492       |
| <b>SAPR-8</b>   | 1.364        | <b>SAPR-8</b>   | 1.129        | <b>JCCU-9</b>   | 9.496        |
| <b>TDD-8</b>    | 1.676        | <b>TDD-8</b>    | 2.751        | <b>CCU-9</b>    | 7.957        |
| <b>JGBF-8</b>   | 14.953       | <b>JGBF-8</b>   | 15.727       | <b>JCSAPR-9</b> | 3.954        |
| <b>JETBPY-8</b> | 27.545       | <b>JETBPY-8</b> | 25.536       | <b>CSAPR-9</b>  | 2.808        |
| <b>JBTPR-8</b>  | 2.765        | <b>JBTPR-8</b>  | 2.931        | <b>JTCTPR-9</b> | 4.105        |
| <b>BTPR-8</b>   | 2.287        | <b>BTPR-8</b>   | 2.136        | <b>TCTPR-9</b>  | 2.232        |
| <b>JSD-8</b>    | 4.349        | <b>JSD-8</b>    | 5.173        | <b>JTDIC-9</b>  | 12.036       |
| <b>TT-8</b>     | 11.291       | <b>TT-8</b>     | 12.073       | <b>HH-9</b>     | 8.826        |
| <b>ETBPY-8</b>  | 21.839       | <b>ETBPY-8</b>  | 21.393       | <b>MFF-9</b>    | 3.254        |

OP-8 = ( $D_{8h}$ ) Octagon  
 HPY-8 = ( $C_{7v}$ ) Heptagonal pyramid  
 HBPY-8 = ( $D_{6h}$ ) Hexagonal bipyramid  
 CU-8 = ( $O_h$ ) Cube  
 SAPR-8 = ( $D_{4d}$ ) Square antiprism  
 TDD-8 = ( $D_{2d}$ ) Triangular dodecahedron  
 JGBF-8 = ( $D_{2d}$ ) Johnson gyrobifastigium J26  
 JETBPY-8 = ( $D_{3h}$ ) Johnson elongated triangular bipyramid J14  
 JBTPR-8 = ( $C_{2v}$ ) Biaugmented trigonal prism J50  
 BTPR-8 = ( $C_{2v}$ ) Biaugmented trigonal pris  
 JSD-8 = ( $D_{2d}$ ) Snub diphenoid J84  
 TT-8 = ( $T_d$ ) Triakis tetrahedron  
 ETBPY-8 = ( $D_{3h}$ ) Elongated trigonal bipyramid  
 EP-9 = ( $D_{9h}$ ) Enneagon  
 OPY-9 = ( $C_{8v}$ ) Octagonal pyramid  
 HBPY-9 = ( $D_{7h}$ ) Heptagonal bipyramid  
 JTC-9 =4 ( $C_{3v}$ ) Johnson triangular cupola J3  
 JCCU-9 = ( $C_{4v}$ ) Capped cube J8  
 CCU-9 = ( $C_{4v}$ ) Spherical-relaxed capped cube  
 JCSAPR-9 = ( $C_{4v}$ ) Capped square antiprism J10  
 CSAPR-9 = ( $C_{4v}$ ) Spherical capped square antiprism  
 JTCTPR-9 = ( $D_{3h}$ ) Tricapped trigonal prism J51  
 TCTPR-9 = ( $D_{3h}$ ) Spherical tricapped trigonal prism  
 JTDIC-9 = ( $C_{3v}$ ) Tridiminished icosahedron J63  
 HH-9 = ( $C_{2v}$ ) Hula-hoop  
 MFF-9 = ( $C_s$ ) Muffin

**Table S3.** Electronic structure of individual Dy(1) fragment calculated with CASSCF-SO using solid-state geometry for  $[\text{Dy}_3(\text{hq})_7(\text{NO}_3)_2(\text{H}_2\text{O})]$ .

| Energy (cm <sup>-1</sup> ) | $g_x$   | $g_y$  | $g_z$   |
|----------------------------|---------|--------|---------|
| 0.0                        | 0.0031  | 0.0031 | 19.7313 |
| 146.675                    | 0.02577 | 0.0283 | 16.8559 |
| 273.297                    | 0.25712 | 0.2877 | 13.8209 |
| 356.719                    | 2.2044  | 2.7268 | 10.3390 |
| 397.772                    | 3.8330  | 5.7488 | 10.4314 |
| 441.506                    | 0.5183  | 1.4976 | 15.5795 |
| 462.338                    | 0.6618  | 1.9093 | 18.1526 |
| 625.039                    | 0.0031  | 0.0082 | 19.7588 |

**Table S4.** Electronic structure of individual Dy(2) fragment calculated with CASSCF-SO using solid-state geometry for  $[\text{Dy}_3(\text{hq})_7(\text{NO}_3)_2(\text{H}_2\text{O})]$ .

| Energy (cm <sup>-1</sup> ) | $g_x$   | $g_y$  | $g_z$   |
|----------------------------|---------|--------|---------|
| 0.0                        | 1.17528 | 2.5234 | 15.8724 |
| 14.523                     | 3.1106  | 6.6821 | 9.2494  |
| 39.999                     | 1.0721  | 4.4142 | 12.6510 |
| 58.65                      | 0.1835  | 2.2840 | 10.7784 |
| 99.578                     | 2.0358  | 2.5718 | 15.5003 |
| 142.308                    | 1.03259 | 5.1647 | 10.8812 |
| 198.017                    | 1.4253  | 3.3889 | 16.5116 |
| 416.435                    | 0.0230  | 0.0539 | 19.6368 |

**Table S5.** Electronic structure of individual Dy(3) fragment calculated with CASSCF-SO using solid-state geometry for  $[\text{Dy}_3(\text{hq})_7(\text{NO}_3)_2(\text{H}_2\text{O})]$ .

| Energy (cm <sup>-1</sup> ) | $g_x$   | $g_y$  | $g_z$   |
|----------------------------|---------|--------|---------|
| 0.0                        | 1.3454  | 2.3672 | 16.1306 |
| 34.729                     | 1.5948  | 4.4755 | 10.5981 |
| 75.518                     | 0.9328  | 4.5785 | 12.3275 |
| 102.514                    | 2.6088  | 5.1682 | 8.9580  |
| 169.739                    | 0.5605  | 2.9019 | 12.8775 |
| 188.479                    | 1.5394  | 4.7664 | 11.7529 |
| 245.130                    | 2.4503  | 3.6999 | 10.2534 |
| 288.837                    | 0.97036 | 3.8682 | 16.1998 |

$$\hat{H}_{CF} = \sum_{k,q} B_k^q O_k^q$$

**Table S6.** Crystal field Hamiltonian is given as  $\hat{H}_{CF} = \sum_{k,q} B_k^q O_k^q$  and the extended Stevens operator coefficients  $B_k^q$  are extracted from CASSCF calculations for **[Dy<sub>3</sub>(hq)<sub>7</sub>(NO<sub>3</sub>)<sub>2</sub>(H<sub>2</sub>O)]**. (the calculation was performed for the individual centers).

| <i>k</i> | <i>q</i> | $B_k^q$     |             |             |
|----------|----------|-------------|-------------|-------------|
|          |          | Dy(1)       | Dy(2)       | Dy(3)       |
| 2        | -2       | 0.0775      | -0.49161    | -0.18992    |
| 2        | -1       | 0.90003     | -0.29656    | -0.8264     |
| 2        | 0        | -2.659      | 0.06266     | -0.25298    |
| 2        | 1        | -2.57459    | -4.57497    | 0.7291      |
| 2        | 2        | 0.97996     | 0.21695     | 1.05765     |
| 4        | -4       | -0.00261    | 0.01533     | 0.00823     |
| 4        | -3       | 0.01068     | 0.01453     | -0.02872    |
| 4        | -2       | 0.00569     | -0.00654    | -0.00438    |
| 4        | -1       | -0.00563    | -0.00567    | -0.01251    |
| 4        | 0        | -0.00387    | -0.00496    | -0.00322    |
| 4        | 1        | 0.00856     | -0.01881    | -0.0079     |
| 4        | 2        | 0.01379     | 0.01918     | 0.00897     |
| 4        | 3        | -0.08847    | -0.04075    | -0.00976    |
| 4        | 4        | 0.01157     | 0.01631     | 0.0205      |
| 6        | -6       | -2.87047E-6 | -1.68086E-4 | -9.5566E-5  |
| 6        | -5       | -2.15146E-4 | -3.26232E-4 | -2.37239E-4 |
| 6        | -4       | -6.83192E-5 | -4.76288E-6 | 2.82357E-4  |
| 6        | -3       | -1.02898E-4 | 1.34513E-4  | 1.81636E-4  |
| 6        | -2       | 1.41136E-5  | 9.95391E-5  | 1.88887E-4  |
| 6        | -1       | -2.30195E-6 | 1.0654E-4   | 9.33672E-5  |
| 6        | 0        | 1.43456E-5  | -8.66577E-6 | -1.74113E-5 |
| 6        | 1        | 5.45324E-5  | 2.74291E-4  | -2.36552E-4 |
| 6        | 2        | -6.07279E-5 | 2.15707E-5  | -1.1768E-5  |
| 6        | 3        | -4.81681E-5 | -2.29162E-4 | -1.02529E-4 |
| 6        | 4        | 1.82462E-4  | 1.41755E-4  | 6.33668E-5  |
| 6        | 5        | -6.3016E-4  | -5.58246E-4 | -1.22168E-5 |
| 6        | 6        | 4.19208E-5  | 2.04249E-5  | 1.14044E-4  |

**Table S7.** Relaxation fitting parameters from the least-square fitting of the Cole-Cole plots for **[Dy<sub>3</sub>(hq)<sub>7</sub>(NO<sub>3</sub>)<sub>2</sub>(H<sub>2</sub>O)]** under a zero-dc field at 2.0-6.8 K according to the generalized Debye model.



| $T / K$ | $\tau / s$ | $\chi_S / \text{cm}^3\text{mol}^{-1}$ | $\chi_T / \text{cm}^3\text{mol}^{-1}$ | $\alpha$ |
|---------|------------|---------------------------------------|---------------------------------------|----------|
| 1.9998  | 0.00120(2) | 6.37(3)                               | 10.55(1)                              | 0.176(8) |
| 2.1878  | 0.00120(2) | 6.09(2)                               | 9.94(1)                               | 0.173(8) |
| 2.3999  | 0.00119(2) | 5.75(2)                               | 9.24(1)                               | 0.171(7) |
| 2.5997  | 0.00118(2) | 5.47(2)                               | 8.68(1)                               | 0.169(7) |
| 2.7996  | 0.00117(2) | 5.21(2)                               | 8.18(1)                               | 0.168(7) |
| 2.9994  | 0.00117(2) | 4.98(2)                               | 7.74(1)                               | 0.167(7) |
| 3.1989  | 0.00116(2) | 4.76(2)                               | 7.34(1)                               | 0.166(7) |
| 3.3997  | 0.00115(2) | 4.56(2)                               | 6.99(1)                               | 0.166(7) |
| 3.5993  | 0.00115(2) | 4.38(1)                               | 6.66(1)                               | 0.163(7) |
| 3.7994  | 0.00114(2) | 4.22(1)                               | 6.37(1)                               | 0.163(6) |
| 3.9969  | 0.00113(2) | 4.06(1)                               | 6.10(1)                               | 0.163(7) |
| 4.0269  | 0.00112(1) | 3.92(1)                               | 5.86(1)                               | 0.161(7) |
| 4.1999  | 0.00108(1) | 3.77(1)                               | 5.63(1)                               | 0.163(7) |
| 4.5981  | 0.00106(1) | 3.63(1)                               | 5.421(4)                              | 0.166(5) |
| 4.7993  | 0.00102(1) | 3.51(1)                               | 5.243(4)                              | 0.167(5) |
| 4.9992  | 0.00100(1) | 3.41(1)                               | 5.062(4)                              | 0.164(5) |
| 5.3989  | 9.47(1)E-4 | 3.21(1)                               | 4.737(3)                              | 0.162(5) |
| 5.7992  | 8.72(9)E-4 | 3.04(1)                               | 4.454(3)                              | 0.159(5) |
| 6.1987  | 7.78(3)E-4 | 2.89(1)                               | 4.204(2)                              | 0.158(4) |
| 6.5983  | 6.61(6)E-4 | 2.74(1)                               | 3.981(2)                              | 0.164(5) |
| 6.9984  | 5.36(6)E-4 | 2.61(1)                               | 3.782(2)                              | 0.172(5) |
| 7.3902  | 4.12(6)E-4 | 2.49(1)                               | 3.604(2)                              | 0.188(6) |
| 7.7985  | 3.02(6)E-4 | 2.39(1)                               | 3.444(2)                              | 0.210(7) |
| 8.1988  | 2.21(7)E-4 | 2.31(2)                               | 3.298(2)                              | 0.229(9) |
| 8.5984  | 1.71(8)E-4 | 2.28(2)                               | 3.162(2)                              | 0.23(1)  |
| 8.9981  | 1.42(7)E-4 | 2.27(2)                               | 3.037(2)                              | 0.22(1)  |
| 9.3978  | 1.18(6)E-4 | 2.27(2)                               | 2.922(2)                              | 0.20(1)  |
| 9.7985  | 9.35(5)E-5 | 2.24(2)                               | 2.816(1)                              | 0.19(1)  |

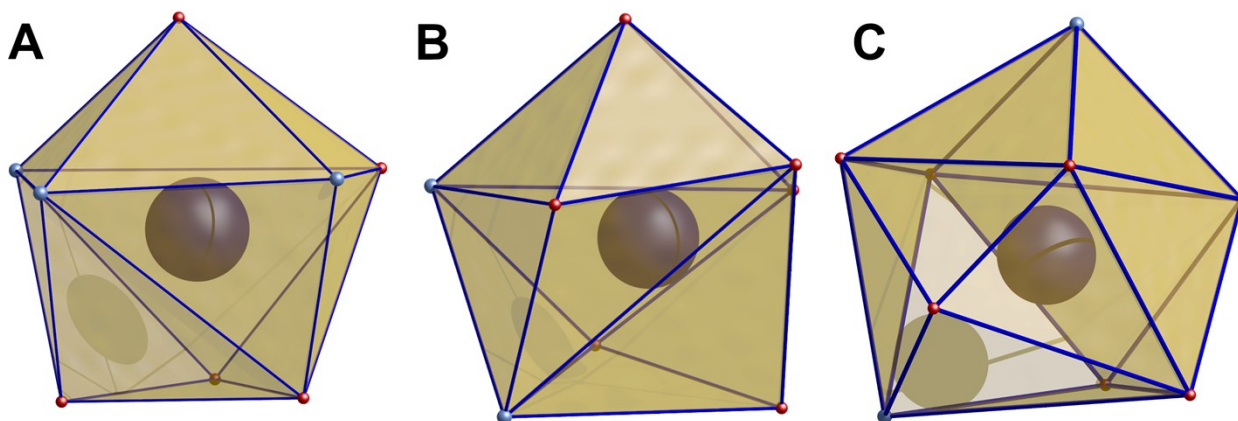

**Figure S1.** Polyhedral representation of the coordination environment for (A) Dy(1); (B) Dy(2); and (C) Dy(3).

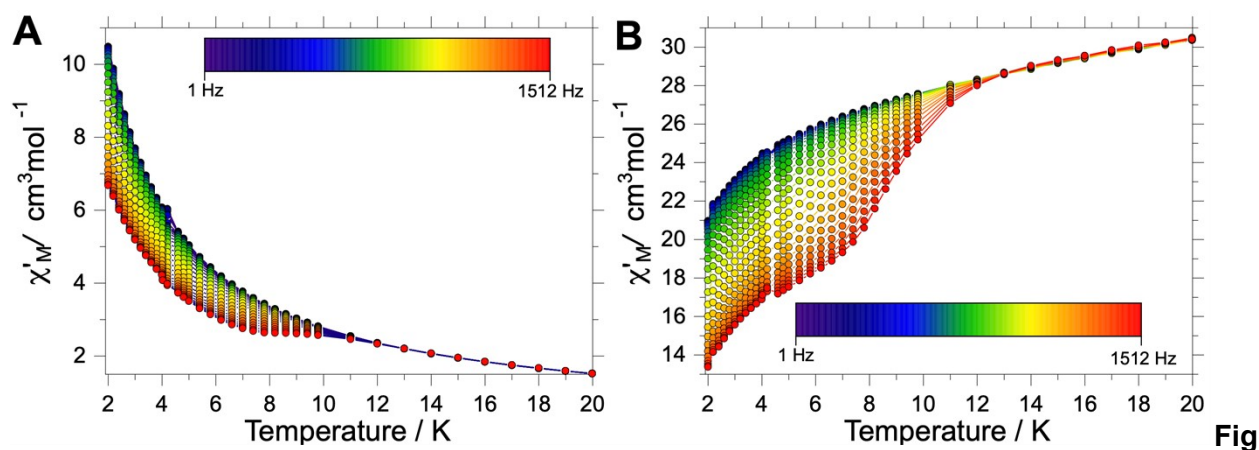

**Figure S2.**  $\chi_M'(T)$  and  $\chi_M''(T)$  data for  $[\text{Dy}_3(\text{hq})_7(\text{NO}_3)_2(\text{HO}_2)]$ .

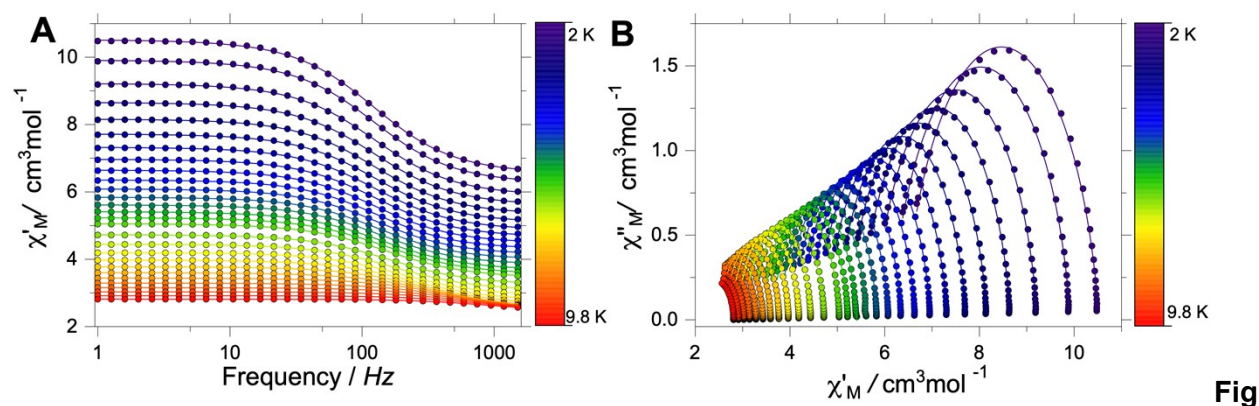

**Figure S3.**  $\chi_M'(\nu)$  and Cole-Cole data for  $[\text{Dy}_3(\text{hq})_7(\text{NO}_3)_2(\text{H}_2\text{O})]$ . Solid lines are the fit to a generalised Debye process.

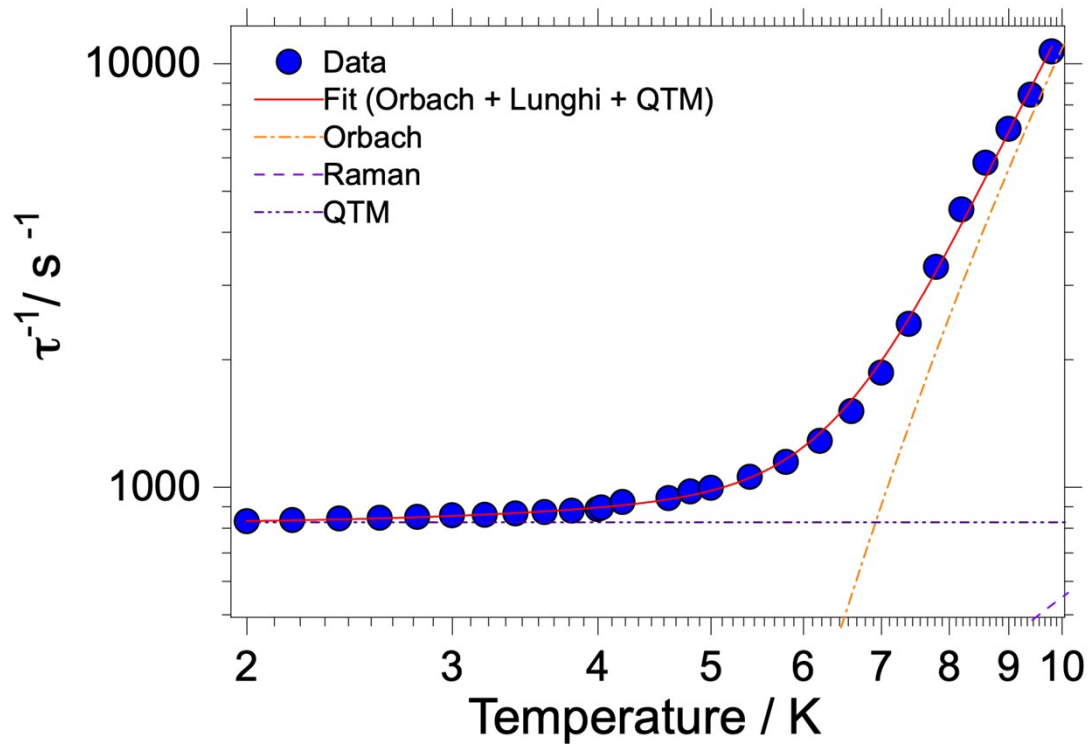

**Figure S4.**  $\tau(T)$  experimental data (blue symbols) for  $[\text{Dy}_3(\text{hq})_7(\text{NO}_3)_2(\text{H}_2\text{O})]$  obtained from the generalised Debye model and the fit to a model comprising the Raman process proposed by Lunghi, Orbach and QTM processes (solid line) and their decomposition.

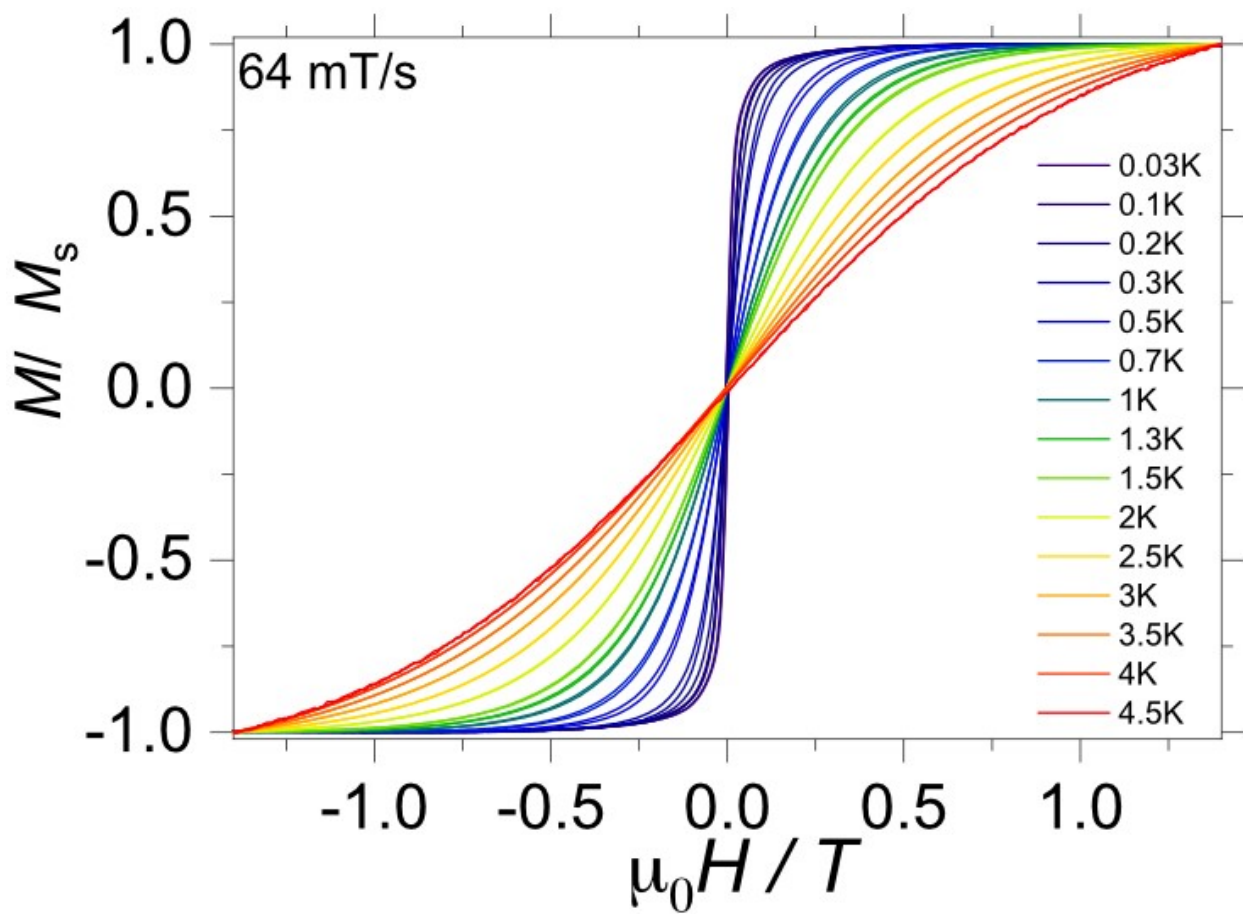

**Figure S5.** Temperature-dependent studies for sweeping rate of 64 mT/s and temperatures between 30 mK and 4.5 K.

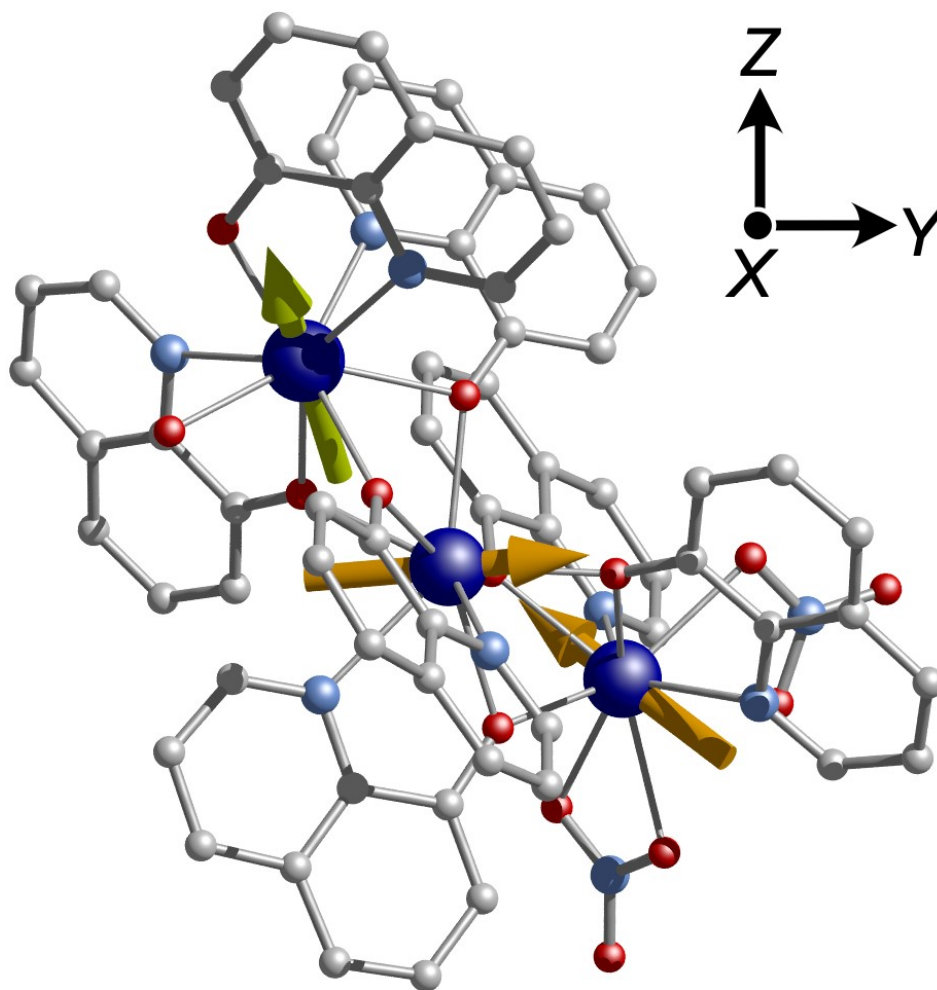

**Figure S6.** Reference frame of  $[\text{Dy}_3(\text{hq})_7(\text{NO}_3)_2(\text{H}_2\text{O})]$  employed for the dipolar field calculations.

## References

- 1 I. Fdez. Galván, M. Vacher, A. Alavi, C. Angeli, F. Aquilante, J. Autschbach, J. J. Bao, S. I. Bokarev, N. A. Bogdanov, R. K. Carlson, L. F. Chibotaru, J. Creutzberg, N. Dattani, M. G. Delcey, S. S. Dong, A. Dreuw, L. Freitag, L. M. Frutos, L. Gagliardi, F. Gendron, A. Giussani, L. González, G. Grell, M. Guo, C. E. Hoyer, M. Johansson, S. Keller, S. Knecht, G. Kovačević, E. Källman, G. Li Manni, M. Lundberg, Y. Ma, S. Mai, J. P. Malhado, P. Å. Malmqvist, P. Marquetand, S. A. Mewes, J. Norell, M. Olivucci, M. Oppel, Q. M. Phung, K. Pierloot, F. Plasser, M. Reiher, A. M. Sand, I. Schapiro, P. Sharma, C. J. Stein, L. K. Sørensen, D. G. Truhlar, M. Ugandi, L. Ungur, A. Valentini, S. Vancoillie, V. Veryazov, O. Weser, T. A. Wesolowski, P. O. Widmark, S. Wouters, A. Zech, J. P. Zobel and R. Lindh, *J Chem Theory Comput*, 2019, **15**, 5925–5964.
- 2 G. Li Manni, I. Fdez. Galván, A. Alavi, F. Aleotti, F. Aquilante, J. Autschbach, D. Avagliano, A. Baiardi, J. J. Bao, S. Battaglia, L. Birnoschi, A. Blanco-González, S. I. Bokarev, R. Broer, R. Cacciari, P. B. Calio, R. K. Carlson, R. Carvalho Couto, L. Cerdán, L. F. Chibotaru, N. F. Chilton, J. R. Church, I. Conti, S. Coriani, J. Cuéllar-Zuquin, R. E.

- Daoud, N. Dattani, P. Decleva, C. de Graaf, M. G. Delcey, L. De Vico, W. Dobrautz, S. S. Dong, R. Feng, N. Ferré, M. Filatov, L. Gagliardi, M. Garavelli, L. González, Y. Guan, M. Guo, M. R. Hennefarth, M. R. Hermes, C. E. Hoyer, M. Huix-Rotllant, V. K. Jaiswal, A. Kaiser, D. S. Kaliakin, M. Khamesian, D. S. King, V. Kochetov, M. Krośnicki, A. A. Kumaar, E. D. Larsson, S. Lehtola, M. B. Lepetit, H. Lischka, P. López Ríos, M. Lundberg, D. Ma, S. Mai, P. Marquetand, I. C. D. Merritt, F. Montorsi, M. Mörchen, A. Nenov, V. H. A. Nguyen, Y. Nishimoto, M. S. Oakley, M. Olivucci, M. Oppel, D. Padula, R. Pandharkar, Q. M. Phung, F. Plasser, G. Raggi, E. Rebolini, M. Reiher, I. Rivalta, D. Roca-Sanjuán, T. Romig, A. A. Safari, A. Sánchez-Mansilla, A. M. Sand, I. Schapiro, T. R. Scott, J. Segarra-Martí, F. Segatta, D. C. Sergentu, P. Sharma, R. Shepard, Y. Shu, J. K. Staab, T. P. Straatsma, L. K. Sørensen, B. N. C. Tenorio, D. G. Truhlar, L. Ungur, M. Vacher, V. Veryazov, T. A. Voß, O. Weser, D. Wu, X. Yang, D. Yarkony, C. Zhou, J. P. Zobel and R. Lindh, *J Chem Theory Comput*, 2023, **19**, 6933–6991.
- 3 B. O. Roos, R. Lindh, P. Å. Malmqvist, V. Veryazov and P. O. Widmark, *Journal of Physical Chemistry A*, 2004, **108**, 2851–2858.
- 4 B. O. Roos, R. Lindh, P.-Å. Malmqvist, V. Veryazov, P.-O. Widmark and A. C. Borin, *J Phys Chem A*, 2008, **112**, 11431–11435.
- 5 P.-O. Widmark, P.-Åke Malmqvist and B. O. Roos, *Theor Chim Acta*, 1990, **77**, 291–306.
- 6 D. Peng and K. Hirao, *J Chem Phys*, 2009, **130**, 044102.
- 7 P. Å. Malmqvist, B. O. Roos and B. Schimmelpfennig, *Chem Phys Lett*, 2002, **357**, 230–240.
- 8 L. F. Chibotaru and L. Ungur, *J Chem Phys*, 2012, **137**, 064112.
- 9 L. Ungur and L. F. Chibotaru, *Chemistry - A European Journal*, 2017, **23**, 3708–3718.
